# Supplementary material
Source: Springer Nature journal article supplement (https://www.springermedizin.de/resource/supplementary/13058_2006_1576_MOESM7_ESM.pdf/9699432)

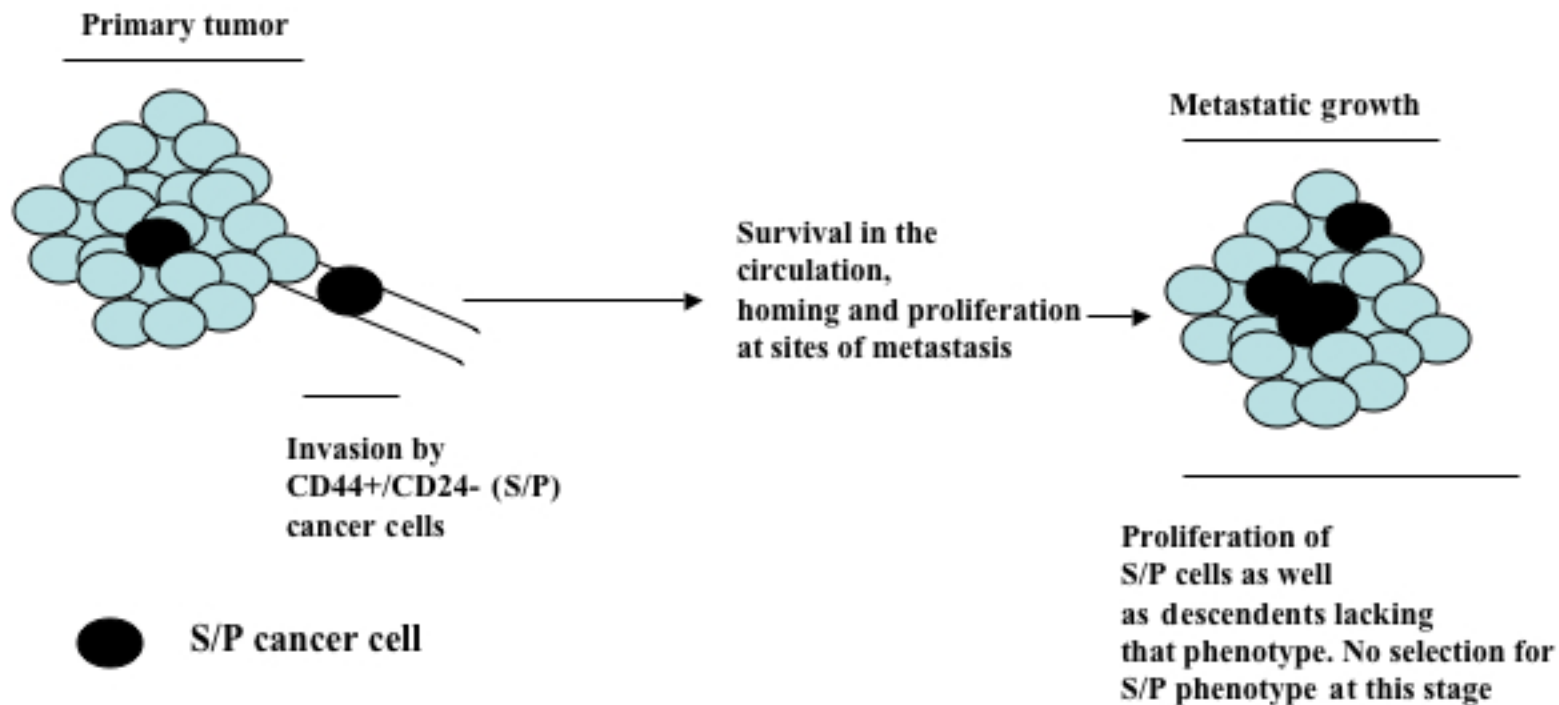

Figure 6

Supplement: MOESM7 [file 9699432]
